# Supplementary material
Source: Springer Nature journal article supplement (https://www.springermedizin.de/resource/supplementary/13075_2011_3648_MOESM1_ESM.pdf/9694954)

**A**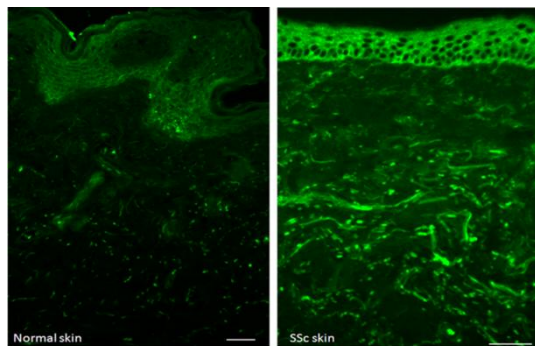**B**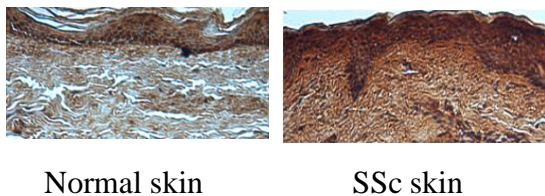**C**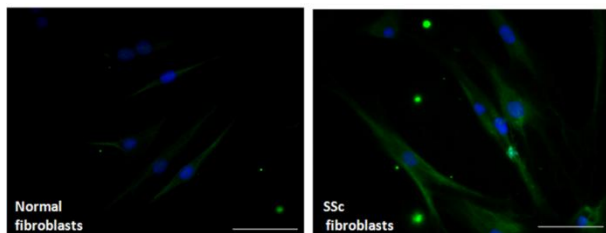**D**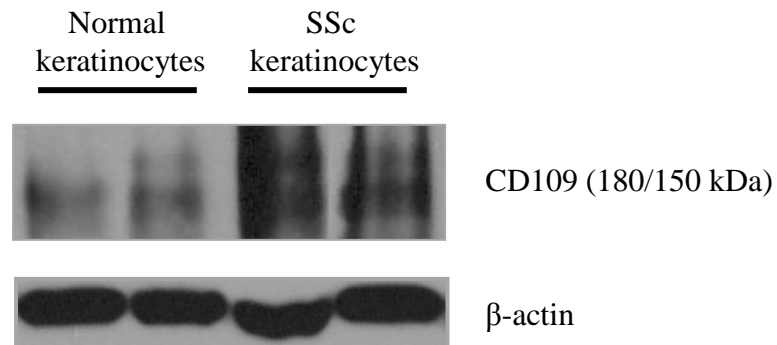**E**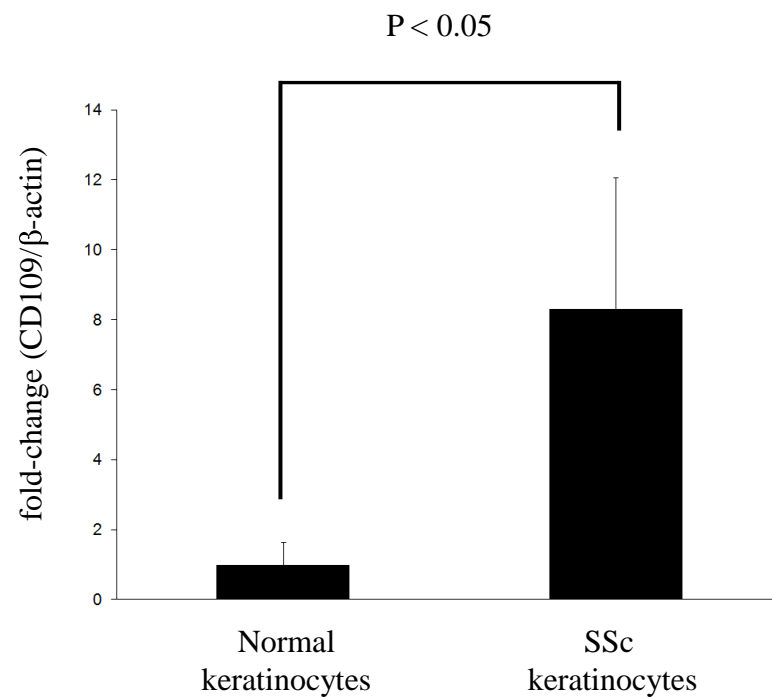

Supplement: MOESM1 [file 9694954]
